# Supplementary material for: Chemical diversity, medicinal potentialities, biosynthesis, and pharmacokinetics of anthraquinones and their congeners derived from marine fungi: a comprehensive update
Source: Royal Society of Chemistry journal article supplement (doi:10.1039/d2ra03610j), 2022-01-01

## Supporting information

# Chemical Diversity, Medicinal Potentialities, Biosynthesis and Pharmacokinetics of Anthraquinones Derived from Marine Fungi: A Comprehensive Update

Mohamed Sebak<sup>1</sup>, Fatma Molham<sup>1</sup>, Claudio Greco<sup>2</sup> Mohamed A. Tammam<sup>3</sup>, Mansour Sobeh<sup>4</sup> and Amr El-Demerdash <sup>5,6\*</sup>

<sup>1</sup> Microbiology and Immunology Department, Faculty of Pharmacy, Beni-Suef University, Beni-Suef 62514, Egypt

<sup>2</sup> Molecular Microbiology Department, The John Innes Center, Norwich Research Park, Norwich NR4 7UH, UK

<sup>3</sup> Department of Biochemistry, Faculty of Agriculture, Fayoum University, Fayoum 63514, Egypt

<sup>4</sup> AgroBioSciences Department, Mohammed VI Polytechnic University (UM6P), Ben Guerir, Morocco

<sup>5</sup> Organic Chemistry Division, Department of Chemistry, Faculty of Science, Mansoura University, Mansoura 35516, Egypt

<sup>6</sup> Department of Metabolic Biology and Biological Chemistry, The John Innes Center, Norwich Research Park, Norwich NR4 7UH, UK

\* Correspondence: [a\\_eldemerdash83@mans.edu.eg](mailto:a_eldemerdash83@mans.edu.eg); [Amr.El-Demerdash@jic.ac.uk](mailto:Amr.El-Demerdash@jic.ac.uk), (A. E-D), Tel: 00447834240424

**Table S1.** Drug-likeness properties of marine-derived fungal anthraquinones. The compounds' numbers are according to the main text.

| Molecule   | MW     | H-bond    |        | Consensus<br>Log P | Fraction<br>Csp3 | RB | TPSA   | ESOL<br>Log S | ESOL<br>Class | MR     | Bioavailability<br>Score | Lipinski | Ghose | Veber | Egan | Muegge |
|------------|--------|-----------|--------|--------------------|------------------|----|--------|---------------|---------------|--------|--------------------------|----------|-------|-------|------|--------|
|            |        | acceptors | donors |                    |                  |    |        |               |               |        |                          |          |       |       |      |        |
| <b>NIG</b> |        |           |        |                    |                  |    |        |               |               |        |                          |          |       |       |      |        |
| 1          | 596.58 | 12        | 8      | 0.42               | 0.45             | 2  | 222.28 | -3.94         | S             | 149.03 | 0.17                     | 3        | 3     | 1     | 1    | 3      |
| 2          | 338.35 | 7         | 4      | 0.79               | 0.59             | 2  | 116.45 | -2.39         | S             | 85.01  | 0.55                     | 0        | 0     | 0     | 0    | 0      |
| 3          | 320.29 | 7         | 4      | 0.17               | 0.38             | 1  | 124.29 | -1.93         | VS            | 77.92  | 0.56                     | 0        | 0     | 0     | 0    | 0      |
| 4          | 300.26 | 6         | 3      | 1.99               | 0.12             | 1  | 104.06 | -4.08         | MS            | 77.28  | 0.55                     | 0        | 0     | 0     | 0    | 0      |
| 5          | 284.26 | 5         | 2      | 2.57               | 0.12             | 1  | 83.83  | -4.81         | MS            | 75.25  | 0.55                     | 0        | 0     | 0     | 0    | 0      |
| 6          | 304.29 | 6         | 3      | 0.91               | 0.38             | 1  | 104.06 | -2.54         | S             | 76.76  | 0.56                     | 0        | 0     | 0     | 0    | 0      |
| 7          | 324.33 | 7         | 5      | 0.4                | 0.56             | 1  | 127.45 | -2.03         | S             | 80.28  | 0.55                     | 0        | 0     | 0     | 0    | 0      |
| 8          | 340.33 | 8         | 6      | -0.53              | 0.56             | 1  | 147.68 | -1.51         | VS            | 81.44  | 0.55                     | 1        | 1     | 1     | 1    | 1      |
| 9          | 320.29 | 7         | 4      | 0.75               | 0.38             | 1  | 124.29 | -2.75         | S             | 78.78  | 0.56                     | 0        | 0     | 0     | 0    | 0      |
| 10         | 336.29 | 8         | 5      | -0.05              | 0.38             | 1  | 144.52 | -2.14         | S             | 79.94  | 0.56                     | 0        | 1     | 1     | 1    | 0      |
| <b>ASP</b> |        |           |        |                    |                  |    |        |               |               |        |                          |          |       |       |      |        |
| 7          | 324.33 | 7         | 5      | 0.4                | 0.56             | 1  | 127.45 | -2.03         | S             | 80.28  | 0.55                     | 0        | 0     | 0     | 0    | 0      |
| 8          | 340.33 | 8         | 6      | -0.53              | 0.56             | 1  | 147.68 | -1.51         | VS            | 81.44  | 0.55                     | 1        | 1     | 1     | 1    | 1      |
| 10         | 336.29 | 8         | 5      | -0.05              | 0.38             | 1  | 144.52 | -2.14         | S             | 79.94  | 0.56                     | 0        | 1     | 1     | 1    | 0      |
| 11         | 460.39 | 9         | 5      | 2.88               | 0.08             | 2  | 165.5  | -5.69         | MS            | 121.27 | 0.55                     | 0        | 0     | 1     | 1    | 1      |
| 12         | 474.42 | 9         | 4      | 3.14               | 0.12             | 3  | 154.5  | -5.9          | MS            | 125.74 | 0.55                     | 0        | 0     | 1     | 1    | 1      |
| 13         | 270.24 | 5         | 3      | 1.87               | 0.07             | 0  | 94.83  | -3.67         | S             | 70.78  | 0.55                     | 0        | 0     | 0     | 0    | 0      |
| 14         | 284.26 | 5         | 2      | 2.27               | 0.12             | 1  | 83.83  | -3.87         | S             | 75.25  | 0.55                     | 0        | 0     | 0     | 0    | 0      |
| 15         | 288.3  | 5         | 3      | 1.94               | 0.31             | 1  | 86.99  | -3.36         | S             | 78.35  | 0.55                     | 0        | 0     | 0     | 0    | 0      |
| 16         | 288.3  | 5         | 3      | 1.92               | 0.31             | 1  | 86.99  | -3.43         | S             | 78.31  | 0.55                     | 0        | 0     | 0     | 0    | 0      |
| 17         | 288.3  | 5         | 3      | 1.92               | 0.31             | 1  | 86.99  | -3.43         | S             | 78.31  | 0.55                     | 0        | 0     | 0     | 0    | 0      |
| 18         | 286.24 | 6         | 4      | 1.63               | 0.07             | 0  | 115.06 | -3.87         | S             | 72.81  | 0.55                     | 0        | 0     | 0     | 0    | 0      |
| 19         | 300.26 | 6         | 3      | 1.96               | 0.12             | 1  | 104.06 | -4.08         | MS            | 77.28  | 0.55                     | 0        | 0     | 0     | 0    | 0      |
| 20         | 402.35 | 9         | 4      | 1.11               | 0.25             | 6  | 150.59 | -3.25         | S             | 98.47  | 0.55                     | 0        | 0     | 1     | 1    | 1      |
| 21         | 538.54 | 8         | 4      | 4.66               | 0.19             | 3  | 133.52 | -7.47         | PS            | 147.55 | 0.55                     | 1        | 2     | 0     | 1    | 1      |

|    |        |    |   |      |      |    |        |       |    |        |      |   |   |   |   |   |
|----|--------|----|---|------|------|----|--------|-------|----|--------|------|---|---|---|---|---|
| 22 | 524.52 | 8  | 5 | 4.31 | 0.16 | 2  | 144.52 | -7.26 | PS | 143.08 | 0.55 | 1 | 2 | 1 | 1 | 1 |
| 23 | 524.52 | 8  | 5 | 4.27 | 0.16 | 2  | 144.52 | -7.26 | PS | 143.08 | 0.55 | 1 | 2 | 1 | 1 | 1 |
| 24 | 754.78 | 13 | 6 | 5.9  | 0.33 | 14 | 217.35 | -9.18 | PS | 201.5  | 0.17 | 3 | 4 | 2 | 2 | 5 |
| 25 | 726.72 | 13 | 8 | 5.22 | 0.3  | 12 | 239.35 | -9.17 | PS | 192.04 | 0.17 | 3 | 4 | 2 | 1 | 5 |
| 26 | 372.37 | 7  | 5 | 2.52 | 0.3  | 5  | 135.29 | -4.69 | MS | 98     | 0.55 | 0 | 0 | 0 | 1 | 0 |
| 27 | 386.4  | 7  | 4 | 2.8  | 0.33 | 6  | 124.29 | -4.69 | MS | 102.73 | 0.55 | 0 | 0 | 0 | 0 | 0 |
| 28 | 354.35 | 6  | 4 | 3.01 | 0.2  | 4  | 115.06 | -4.96 | MS | 97.16  | 0.55 | 0 | 0 | 0 | 0 | 0 |
| 29 | 400.42 | 7  | 3 | 3.22 | 0.36 | 7  | 113.29 | -5.12 | MS | 106.94 | 0.55 | 0 | 0 | 0 | 0 | 0 |
| 30 | 368.34 | 7  | 3 | 2.32 | 0.3  | 0  | 113.29 | -4.33 | MS | 93.4   | 0.55 | 0 | 0 | 0 | 0 | 0 |
| 31 | 382.36 | 7  | 2 | 2.74 | 0.33 | 1  | 102.29 | -4.54 | MS | 97.87  | 0.55 | 0 | 0 | 0 | 0 | 0 |
| 32 | 396.39 | 7  | 1 | 3.06 | 0.36 | 2  | 91.29  | -4.76 | MS | 102.34 | 0.55 | 0 | 0 | 0 | 0 | 0 |
| 33 | 340.28 | 7  | 3 | 1.7  | 0.22 | 0  | 113.29 | -3.75 | S  | 83.75  | 0.55 | 0 | 0 | 0 | 0 | 0 |
| 34 | 356.28 | 8  | 4 | 0.87 | 0.22 | 0  | 133.52 | -3.22 | S  | 84.91  | 0.55 | 0 | 0 | 0 | 1 | 0 |
| 36 | 356.33 | 7  | 4 | 1.84 | 0.26 | 1  | 124.29 | -3.92 | S  | 91.01  | 0.55 | 0 | 0 | 0 | 0 | 0 |
| 37 | 384.34 | 8  | 4 | 1.52 | 0.3  | 0  | 133.52 | -3.8  | S  | 94.56  | 0.55 | 0 | 0 | 0 | 1 | 0 |
| 38 | 412.39 | 8  | 2 | 2.26 | 0.36 | 2  | 111.52 | -4.23 | MS | 103.5  | 0.55 | 0 | 0 | 0 | 0 | 0 |
| 39 | 360.31 | 8  | 6 | 0.79 | 0.22 | 4  | 155.52 | -2.81 | S  | 89.55  | 0.55 | 1 | 0 | 1 | 1 | 2 |
| 40 | 388.37 | 8  | 4 | 1.52 | 0.3  | 6  | 133.52 | -3.23 | S  | 98.49  | 0.55 | 0 | 0 | 0 | 1 | 0 |
| 41 | 284.26 | 5  | 2 | 2.19 | 0.12 | 1  | 83.83  | -3.87 | S  | 75.25  | 0.55 | 0 | 0 | 0 | 0 | 0 |
| 42 | 328.32 | 6  | 3 | 1.97 | 0.22 | 3  | 104.06 | -3.74 | S  | 86.03  | 0.55 | 0 | 0 | 0 | 0 | 0 |
| 43 | 368.34 | 7  | 1 | 2.42 | 0.3  | 2  | 91.29  | -4.18 | MS | 92.69  | 0.55 | 0 | 0 | 0 | 0 | 0 |
| 44 | 366.32 | 7  | 1 | 2.42 | 0.2  | 2  | 91.29  | -4.36 | MS | 92.21  | 0.55 | 0 | 0 | 0 | 0 | 0 |
| 45 | 300.26 | 6  | 3 | 1.86 | 0.12 | 1  | 104.06 | -3.73 | S  | 77.28  | 0.55 | 0 | 0 | 0 | 0 | 0 |
| 46 | 314.29 | 6  | 2 | 2.23 | 0.18 | 2  | 93.06  | -3.95 | S  | 81.75  | 0.55 | 0 | 0 | 0 | 0 | 0 |
| 47 | 238.24 | 3  | 1 | 2.72 | 0.07 | 0  | 54.37  | -4.25 | MS | 66.74  | 0.55 | 0 | 0 | 0 | 0 | 0 |
| 48 | 298.29 | 5  | 1 | 2.26 | 0.18 | 3  | 72.83  | -3.6  | S  | 78.52  | 0.55 | 0 | 0 | 0 | 0 | 0 |
| 49 | 222.24 | 2  | 0 | 3.01 | 0.07 | 0  | 34.14  | -4.22 | MS | 64.72  | 0.55 | 0 | 0 | 0 | 0 | 0 |
| 50 | 282.25 | 5  | 1 | 1.84 | 0.06 | 2  | 80.67  | -3.46 | S  | 73.65  | 0.55 | 0 | 0 | 0 | 0 | 0 |
| 51 | 240.21 | 4  | 2 | 1.98 | 0    | 0  | 74.6   | -3.81 | S  | 63.8   | 0.55 | 0 | 0 | 0 | 0 | 0 |
| 52 | 254.24 | 4  | 2 | 2.23 | 0.07 | 0  | 74.6   | -3.82 | S  | 68.76  | 0.55 | 0 | 0 | 0 | 0 | 0 |
| 53 | 270.24 | 5  | 3 | 1.5  | 0.07 | 0  | 94.83  | -3.67 | S  | 70.78  | 0.55 | 0 | 0 | 0 | 0 | 0 |

|    |        |   |   |      |      |   |        |       |    |        |      |   |   |   |   |   |
|----|--------|---|---|------|------|---|--------|-------|----|--------|------|---|---|---|---|---|
| 54 | 284.26 | 5 | 2 | 1.98 | 0.12 | 1 | 83.83  | -3.53 | S  | 75.25  | 0.55 | 0 | 0 | 0 | 0 | 0 |
| 55 | 316.26 | 7 | 3 | 1.52 | 0.12 | 2 | 117.2  | -3.27 | S  | 82.93  | 0.55 | 0 | 0 | 0 | 0 | 0 |
| 56 | 270.24 | 5 | 3 | 2    | 0.07 | 0 | 94.83  | -4.02 | MS | 70.78  | 0.55 | 0 | 0 | 0 | 0 | 0 |
| 57 | 298.29 | 5 | 1 | 2.6  | 0.18 | 2 | 72.83  | -4.08 | MS | 79.72  | 0.55 | 0 | 0 | 0 | 0 | 0 |
| 58 | 284.26 | 5 | 2 | 2.43 | 0.12 | 1 | 83.83  | -4.23 | MS | 75.25  | 0.55 | 0 | 0 | 0 | 0 | 0 |
| 59 | 288.25 | 6 | 4 | 1.95 | 0.13 | 0 | 107.22 | -3.83 | S  | 73.91  | 0.55 | 0 | 0 | 0 | 0 | 0 |
| 60 | 302.28 | 6 | 3 | 2.34 | 0.19 | 1 | 96.22  | -4.04 | MS | 78.38  | 0.55 | 0 | 0 | 0 | 0 | 0 |
| 61 | 388.32 | 9 | 5 | 0.87 | 0.21 | 5 | 161.59 | -3.38 | S  | 94     | 0.55 | 0 | 0 | 1 | 1 | 1 |
| 62 | 300.26 | 6 | 3 | 1.42 | 0.12 | 2 | 104.06 | -3.1  | S  | 76.41  | 0.55 | 0 | 0 | 0 | 0 | 0 |
| 63 | 300.26 | 6 | 3 | 1.5  | 0.12 | 2 | 104.06 | -3.1  | S  | 76.41  | 0.55 | 0 | 0 | 0 | 0 | 0 |
| 64 | 300.26 | 6 | 3 | 1.97 | 0.12 | 1 | 104.06 | -4.08 | MS | 77.28  | 0.55 | 0 | 0 | 0 | 0 | 0 |
| 65 | 340.28 | 7 | 3 | 1.7  | 0.22 | 0 | 113.29 | -3.75 | S  | 83.75  | 0.55 | 0 | 0 | 0 | 0 | 0 |
| 66 | 340.28 | 7 | 3 | 1.6  | 0.22 | 0 | 113.29 | -3.75 | S  | 83.75  | 0.55 | 0 | 0 | 0 | 0 | 0 |
| 67 | 370.35 | 7 | 4 | 2.46 | 0.25 | 5 | 132.13 | -4.74 | MS | 97.26  | 0.55 | 0 | 0 | 0 | 1 | 0 |
| 68 | 386.4  | 7 | 4 | 2.94 | 0.33 | 6 | 124.29 | -4.9  | MS | 102.47 | 0.55 | 0 | 0 | 0 | 0 | 0 |
| 69 | 400.42 | 7 | 3 | 3.3  | 0.36 | 7 | 113.29 | -4.9  | MS | 107.2  | 0.55 | 0 | 0 | 0 | 0 | 0 |
| 70 | 428.47 | 7 | 4 | 3.9  | 0.42 | 9 | 124.29 | -5.51 | MS | 117.15 | 0.55 | 0 | 0 | 0 | 0 | 1 |
| 71 | 406.81 | 7 | 5 | 3.02 | 0.3  | 5 | 135.29 | -5.29 | MS | 103.01 | 0.55 | 0 | 0 | 0 | 1 | 0 |
| 72 | 420.84 | 7 | 4 | 3.42 | 0.33 | 6 | 124.29 | -5.5  | MS | 107.48 | 0.55 | 0 | 0 | 0 | 0 | 0 |
| 73 | 420.84 | 7 | 4 | 3.42 | 0.33 | 6 | 124.29 | -5.29 | MS | 107.74 | 0.55 | 0 | 0 | 0 | 0 | 0 |
| 74 | 434.87 | 7 | 3 | 3.81 | 0.36 | 7 | 113.29 | -5.5  | MS | 112.21 | 0.55 | 0 | 0 | 0 | 0 | 0 |
| 75 | 462.92 | 7 | 4 | 4.41 | 0.42 | 9 | 124.29 | -6.11 | PS | 122.16 | 0.55 | 0 | 0 | 0 | 0 | 1 |
| 76 | 388.8  | 6 | 4 | 3.55 | 0.2  | 4 | 115.06 | -5.56 | MS | 102.17 | 0.55 | 0 | 0 | 0 | 0 | 1 |
| 77 | 402.82 | 6 | 3 | 3.94 | 0.24 | 5 | 104.06 | -5.78 | MS | 106.64 | 0.55 | 0 | 0 | 0 | 0 | 1 |
| 78 | 465.29 | 7 | 4 | 3.44 | 0.33 | 6 | 124.29 | -5.82 | MS | 110.17 | 0.55 | 0 | 0 | 0 | 0 | 1 |
| 79 | 479.32 | 7 | 3 | 3.9  | 0.36 | 7 | 113.29 | -5.82 | MS | 114.9  | 0.55 | 0 | 0 | 0 | 0 | 1 |
| 80 | 414.45 | 7 | 2 | 3.54 | 0.39 | 8 | 102.29 | -5.12 | MS | 111.67 | 0.55 | 0 | 0 | 0 | 0 | 0 |

---

**PEN**

|    |        |   |   |      |      |   |       |       |   |       |      |   |   |   |   |   |
|----|--------|---|---|------|------|---|-------|-------|---|-------|------|---|---|---|---|---|
| 13 | 270.24 | 5 | 3 | 1.87 | 0.07 | 0 | 94.83 | -3.67 | S | 70.78 | 0.55 | 0 | 0 | 0 | 0 | 0 |
|----|--------|---|---|------|------|---|-------|-------|---|-------|------|---|---|---|---|---|

|    |        |    |   |      |      |   |        |       |    |        |      |   |   |   |   |   |
|----|--------|----|---|------|------|---|--------|-------|----|--------|------|---|---|---|---|---|
| 17 | 288.3  | 5  | 3 | 1.92 | 0.31 | 1 | 86.99  | -3.43 | S  | 78.31  | 0.55 | 0 | 0 | 0 | 0 | 0 |
| 26 | 372.37 | 7  | 5 | 2.52 | 0.3  | 5 | 135.29 | -4.69 | MS | 98     | 0.55 | 0 | 0 | 0 | 1 | 0 |
| 27 | 386.4  | 7  | 4 | 2.8  | 0.33 | 6 | 124.29 | -4.69 | MS | 102.73 | 0.55 | 0 | 0 | 0 | 0 | 0 |
| 37 | 384.34 | 8  | 4 | 1.52 | 0.3  | 0 | 133.52 | -3.8  | S  | 94.56  | 0.55 | 0 | 0 | 0 | 1 | 0 |
| 81 | 520.48 | 10 | 6 | 2.96 | 0.25 | 2 | 181.82 | -6.52 | PS | 134.57 | 0.11 | 2 | 2 | 1 | 1 | 3 |
| 82 | 536.48 | 11 | 7 | 2.25 | 0.25 | 3 | 202.05 | -5.76 | MS | 135.73 | 0.11 | 3 | 2 | 1 | 1 | 3 |
| 83 | 254.24 | 4  | 2 | 2.38 | 0.07 | 0 | 74.6   | -4.11 | MS | 68.76  | 0.55 | 0 | 0 | 0 | 0 | 0 |
| 84 | 286.24 | 6  | 4 | 1.08 | 0.07 | 1 | 115.06 | -2.9  | S  | 71.95  | 0.55 | 0 | 0 | 0 | 0 | 0 |
| 85 | 376.74 | 7  | 2 | 2.46 | 0.17 | 4 | 110.13 | -4.14 | MS | 91.16  | 0.55 | 0 | 0 | 0 | 0 | 0 |
| 86 | 366.3  | 9  | 4 | 0.44 | 0.07 | 3 | 166.81 | -2.82 | S  | 82.14  | 0.11 | 0 | 0 | 1 | 1 | 1 |
| 87 | 350.3  | 8  | 3 | 1.29 | 0.07 | 2 | 146.58 | -3.59 | S  | 80.98  | 0.56 | 0 | 0 | 1 | 1 | 0 |
| 88 | 270.24 | 5  | 3 | 1.5  | 0.07 | 1 | 94.83  | -3.04 | S  | 69.92  | 0.55 | 0 | 0 | 0 | 0 | 0 |
| 89 | 413.38 | 8  | 4 | 1.79 | 0.24 | 6 | 150.23 | -4.14 | MS | 104.13 | 0.55 | 0 | 0 | 1 | 1 | 1 |
| 90 | 399.35 | 8  | 5 | 1.52 | 0.2  | 5 | 161.23 | -3.92 | S  | 99.81  | 0.11 | 0 | 0 | 1 | 1 | 1 |
| 91 | 433.8  | 8  | 5 | 1.95 | 0.2  | 5 | 161.23 | -4.52 | MS | 104.82 | 0.11 | 0 | 0 | 1 | 1 | 1 |
| 92 | 427.4  | 8  | 4 | 2.11 | 0.27 | 7 | 150.23 | -4.37 | MS | 108.94 | 0.55 | 0 | 0 | 1 | 1 | 1 |
| 93 | 413.38 | 8  | 5 | 1.73 | 0.24 | 6 | 161.23 | -4.16 | MS | 104.62 | 0.11 | 0 | 0 | 1 | 1 | 1 |
| 94 | 447.82 | 8  | 5 | 2.27 | 0.24 | 6 | 161.23 | -4.76 | MS | 109.63 | 0.11 | 0 | 0 | 1 | 1 | 1 |
| 95 | 447.82 | 8  | 5 | 2.23 | 0.24 | 6 | 161.23 | -4.76 | MS | 109.63 | 0.11 | 0 | 0 | 1 | 1 | 1 |
| 96 | 371.3  | 8  | 5 | 0.84 | 0.11 | 4 | 161.23 | -3.23 | S  | 90.2   | 0.11 | 0 | 0 | 1 | 1 | 1 |
| 97 | 300.22 | 7  | 4 | 1.07 | 0    | 1 | 132.13 | -3.22 | S  | 72.78  | 0.56 | 0 | 0 | 0 | 1 | 0 |
| 98 | 320.68 | 6  | 4 | 1.62 | 0.07 | 1 | 115.06 | -3.49 | S  | 76.96  | 0.55 | 0 | 0 | 0 | 0 | 0 |

---

**STE**

|     |        |   |   |       |      |   |        |       |    |       |      |   |   |   |   |   |
|-----|--------|---|---|-------|------|---|--------|-------|----|-------|------|---|---|---|---|---|
| 99  | 336.29 | 8 | 5 | -0.67 | 0.38 | 1 | 144.52 | -1.2  | VS | 79.36 | 0.55 | 0 | 1 | 1 | 1 | 0 |
| 100 | 322.31 | 7 | 5 | -0.11 | 0.44 | 1 | 127.45 | -1.49 | VS | 78.94 | 0.55 | 0 | 1 | 0 | 0 | 0 |
| 101 | 304.29 | 6 | 3 | 1.11  | 0.38 | 1 | 104.06 | -2.42 | S  | 77.04 | 0.55 | 0 | 0 | 0 | 0 | 0 |
| 102 | 308.33 | 6 | 4 | 0.72  | 0.56 | 1 | 107.22 | -2.17 | S  | 78.25 | 0.55 | 0 | 0 | 0 | 0 | 0 |
| 103 | 346.33 | 7 | 2 | 1.55  | 0.39 | 3 | 110.13 | -2.88 | S  | 86.78 | 0.55 | 0 | 0 | 0 | 0 | 0 |

|     |        |    |    |       |      |   |        |       |    |        |      |   |   |   |   |   |
|-----|--------|----|----|-------|------|---|--------|-------|----|--------|------|---|---|---|---|---|
| 104 | 320.29 | 7  | 4  | 0.24  | 0.38 | 1 | 124.29 | -1.81 | VS | 78.2   | 0.55 | 0 | 0 | 0 | 0 | 0 |
| 105 | 324.33 | 7  | 5  | -0.22 | 0.56 | 1 | 127.45 | -1.64 | VS | 79.42  | 0.55 | 0 | 1 | 0 | 0 | 0 |
| 106 | 366.36 | 8  | 4  | 0.31  | 0.56 | 3 | 133.52 | -2.12 | S  | 89.15  | 0.55 | 0 | 0 | 0 | 1 | 0 |
| 107 | 340.33 | 8  | 6  | -0.91 | 0.56 | 1 | 147.68 | -1.12 | VS | 80.58  | 0.55 | 1 | 1 | 1 | 1 | 1 |
| 108 | 284.26 | 5  | 2  | 2.22  | 0.12 | 1 | 83.83  | -3.87 | S  | 75.25  | 0.55 | 0 | 0 | 0 | 0 | 0 |
| 109 | 364.33 | 8  | 2  | 1.65  | 0.12 | 3 | 135.58 | -3.8  | S  | 85.45  | 0.56 | 0 | 0 | 0 | 1 | 0 |
| 110 | 488.44 | 11 | 4  | 0.93  | 0.38 | 6 | 169.05 | -3.52 | S  | 117.11 | 0.55 | 1 | 1 | 1 | 1 | 2 |
| 111 | 352.29 | 9  | 5  | -0.9  | 0.5  | 1 | 157.05 | -1.06 | VS | 78.89  | 0.55 | 0 | 1 | 1 | 1 | 1 |
| 112 | 618.54 | 13 | 7  | 1.08  | 0.25 | 3 | 228.35 | -4.65 | MS | 153.61 | 0.17 | 3 | 3 | 1 | 1 | 4 |
| 113 | 618.54 | 13 | 7  | 1.08  | 0.25 | 3 | 228.35 | -4.65 | MS | 153.61 | 0.17 | 3 | 3 | 1 | 1 | 4 |
| 114 | 566.51 | 10 | 4  | 3.95  | 0.12 | 3 | 167.66 | -7.22 | PS | 149.5  | 0.55 | 1 | 2 | 1 | 1 | 2 |
| 115 | 670.57 | 16 | 10 | -1.82 | 0.38 | 3 | 289.04 | -2.11 | S  | 157.72 | 0.17 | 3 | 4 | 1 | 1 | 5 |
| 116 | 670.57 | 16 | 10 | -1.82 | 0.38 | 3 | 289.04 | -2.11 | S  | 157.72 | 0.17 | 3 | 4 | 1 | 1 | 5 |
| 117 | 618.54 | 13 | 7  | 1.02  | 0.25 | 3 | 228.35 | -4.65 | MS | 153.61 | 0.17 | 3 | 3 | 1 | 1 | 4 |
| 118 | 566.51 | 10 | 4  | 3.94  | 0.12 | 3 | 167.66 | -7.22 | PS | 149.5  | 0.55 | 1 | 2 | 1 | 1 | 2 |
| 119 | 566.51 | 10 | 4  | 3.95  | 0.12 | 3 | 167.66 | -7.22 | PS | 149.5  | 0.55 | 1 | 2 | 1 | 1 | 2 |
| 120 | 622.57 | 13 | 7  | 0.74  | 0.38 | 3 | 228.35 | -3.92 | S  | 154.24 | 0.17 | 3 | 3 | 1 | 1 | 4 |
| 121 | 606.57 | 12 | 6  | 1.64  | 0.38 | 3 | 208.12 | -4.52 | MS | 153.08 | 0.17 | 3 | 3 | 1 | 1 | 4 |
| 122 | 566.51 | 10 | 4  | 3.86  | 0.12 | 3 | 167.66 | -7.22 | PS | 149.5  | 0.55 | 1 | 2 | 1 | 1 | 2 |
| 123 | 602.54 | 12 | 6  | 2     | 0.25 | 3 | 208.12 | -5.27 | MS | 152.45 | 0.17 | 3 | 2 | 1 | 1 | 4 |
| 124 | 602.54 | 12 | 6  | 1.98  | 0.25 | 3 | 208.12 | -5.27 | MS | 152.45 | 0.17 | 3 | 2 | 1 | 1 | 4 |
| 125 | 618.54 | 13 | 7  | 1.19  | 0.25 | 3 | 228.35 | -4.65 | MS | 153.61 | 0.17 | 3 | 3 | 1 | 1 | 4 |
| 126 | 618.54 | 13 | 7  | 1     | 0.25 | 3 | 228.35 | -4.65 | MS | 153.61 | 0.17 | 3 | 3 | 1 | 1 | 4 |
| 127 | 618.54 | 13 | 7  | 1     | 0.25 | 3 | 228.35 | -4.65 | MS | 153.61 | 0.17 | 3 | 3 | 1 | 1 | 4 |
| 128 | 632.57 | 13 | 6  | 1.43  | 0.27 | 4 | 217.35 | -5.01 | MS | 158.34 | 0.17 | 3 | 3 | 1 | 1 | 4 |
| 129 | 446.4  | 10 | 5  | 0.64  | 0.36 | 4 | 162.98 | -3.4  | S  | 107.38 | 0.55 | 0 | 0 | 1 | 1 | 1 |
| 130 | 606.57 | 12 | 6  | 1.74  | 0.38 | 3 | 208.12 | -4.52 | MS | 153.08 | 0.17 | 3 | 3 | 1 | 1 | 4 |

---

ALT

|     |        |    |   |       |      |   |        |       |    |        |      |   |   |   |   |   |
|-----|--------|----|---|-------|------|---|--------|-------|----|--------|------|---|---|---|---|---|
| 100 | 322.31 | 7  | 5 | -0.11 | 0.44 | 1 | 127.45 | -1.49 | VS | 78.94  | 0.55 | 0 | 1 | 0 | 0 | 0 |
| 101 | 304.29 | 6  | 3 | 1.11  | 0.38 | 1 | 104.06 | -2.42 | S  | 77.04  | 0.55 | 0 | 0 | 0 | 0 | 0 |
| 102 | 308.33 | 6  | 4 | 0.72  | 0.56 | 1 | 107.22 | -2.17 | S  | 78.25  | 0.55 | 0 | 0 | 0 | 0 | 0 |
| 104 | 320.29 | 7  | 4 | 0.24  | 0.38 | 1 | 124.29 | -1.81 | VS | 78.2   | 0.55 | 0 | 0 | 0 | 0 | 0 |
| 105 | 324.33 | 7  | 5 | -0.22 | 0.56 | 1 | 127.45 | -1.64 | VS | 79.42  | 0.55 | 0 | 1 | 0 | 0 | 0 |
| 107 | 340.33 | 8  | 6 | -0.91 | 0.56 | 1 | 147.68 | -1.12 | VS | 80.58  | 0.55 | 1 | 1 | 1 | 1 | 1 |
| 108 | 284.26 | 5  | 2 | 2.22  | 0.12 | 1 | 83.83  | -3.87 | S  | 75.25  | 0.55 | 0 | 0 | 0 | 0 | 0 |
| 114 | 566.51 | 10 | 4 | 3.95  | 0.12 | 3 | 167.66 | -7.22 | PS | 149.5  | 0.55 | 1 | 2 | 1 | 1 | 2 |
| 131 | 586.54 | 11 | 5 | 2.66  | 0.25 | 3 | 187.89 | -5.71 | MS | 151.29 | 0.17 | 2 | 2 | 1 | 1 | 2 |
| 132 | 602.54 | 12 | 6 | 1.7   | 0.25 | 3 | 208.12 | -5.27 | MS | 152.45 | 0.17 | 3 | 2 | 1 | 1 | 4 |
| 133 | 602.54 | 12 | 6 | 1.96  | 0.25 | 3 | 208.12 | -5.27 | MS | 152.45 | 0.17 | 3 | 2 | 1 | 1 | 4 |
| 134 | 638.57 | 14 | 8 | -0.29 | 0.38 | 3 | 248.58 | -3.09 | S  | 154.29 | 0.17 | 3 | 4 | 1 | 1 | 4 |
| 135 | 602.54 | 12 | 6 | 1.62  | 0.25 | 3 | 208.12 | -5.27 | MS | 152.45 | 0.17 | 3 | 2 | 1 | 1 | 4 |
| 136 | 308.33 | 6  | 4 | 0.78  | 0.56 | 1 | 107.22 | -2.17 | S  | 78.25  | 0.55 | 0 | 0 | 0 | 0 | 0 |
| 137 | 308.33 | 6  | 4 | 0.72  | 0.56 | 1 | 107.22 | -2.17 | S  | 78.25  | 0.55 | 0 | 0 | 0 | 0 | 0 |
| 138 | 308.33 | 6  | 4 | 0.73  | 0.56 | 1 | 107.22 | -2.17 | S  | 78.25  | 0.55 | 0 | 0 | 0 | 0 | 0 |
| 139 | 350.36 | 7  | 3 | 1.18  | 0.56 | 3 | 113.29 | -2.63 | S  | 87.99  | 0.55 | 0 | 0 | 0 | 0 | 0 |
| 140 | 488.48 | 10 | 5 | 0.39  | 0.6  | 1 | 162.98 | -2.51 | S  | 118.47 | 0.11 | 0 | 1 | 1 | 1 | 1 |
| 141 | 300.26 | 6  | 3 | 1.92  | 0.12 | 1 | 104.06 | -3.73 | S  | 77.28  | 0.55 | 0 | 0 | 0 | 0 | 0 |
| 142 | 288.3  | 5  | 2 | 1.88  | 0.38 | 1 | 83.83  | -2.94 | S  | 75.88  | 0.55 | 0 | 0 | 0 | 0 | 0 |

|            |        |   |   |      |      |   |        |       |    |       |      |   |   |   |   |   |
|------------|--------|---|---|------|------|---|--------|-------|----|-------|------|---|---|---|---|---|
| <b>TRI</b> |        |   |   |      |      |   |        |       |    |       |      |   |   |   |   |   |
| 13         | 270.24 | 5 | 3 | 1.87 | 0.07 | 0 | 94.83  | -3.67 | S  | 70.78 | 0.55 | 0 | 0 | 0 | 0 | 0 |
| 83         | 254.24 | 4 | 2 | 2.38 | 0.07 | 0 | 74.6   | -4.11 | MS | 68.76 | 0.55 | 0 | 0 | 0 | 0 | 0 |
| 84         | 286.24 | 6 | 4 | 1.08 | 0.07 | 1 | 115.06 | -2.9  | S  | 71.95 | 0.55 | 0 | 0 | 0 | 0 | 0 |
| 143        | 276.28 | 5 | 4 | 0.55 | 0.4  | 0 | 97.99  | -2.01 | S  | 71.41 | 0.55 | 0 | 0 | 0 | 0 | 0 |
| 144        | 276.28 | 5 | 4 | 0.54 | 0.4  | 0 | 97.99  | -2.01 | S  | 71.41 | 0.55 | 0 | 0 | 0 | 0 | 0 |
| 145        | 254.24 | 4 | 2 | 2.22 | 0.07 | 0 | 74.6   | -3.82 | S  | 68.76 | 0.55 | 0 | 0 | 0 | 0 | 0 |

|     |        |   |   |      |      |   |        |       |    |       |      |   |   |   |   |   |
|-----|--------|---|---|------|------|---|--------|-------|----|-------|------|---|---|---|---|---|
| 146 | 270.24 | 5 | 3 | 1.43 | 0.07 | 1 | 94.83  | -3.04 | S  | 69.92 | 0.55 | 0 | 0 | 0 | 0 | 0 |
| 147 | 238.24 | 3 | 1 | 2.73 | 0.07 | 0 | 54.37  | -4.25 | MS | 66.74 | 0.55 | 0 | 0 | 0 | 0 | 0 |
| 148 | 314.29 | 6 | 4 | 1.68 | 0.18 | 2 | 115.06 | -3.53 | S  | 81.56 | 0.55 | 0 | 0 | 0 | 0 | 0 |
| 149 | 254.24 | 4 | 2 | 1.94 | 0.07 | 1 | 74.6   | -3.47 | S  | 67.9  | 0.55 | 0 | 0 | 0 | 0 | 0 |
| 150 | 290.27 | 6 | 4 | 0.28 | 0.33 | 0 | 115.06 | -1.84 | VS | 71.83 | 0.55 | 0 | 0 | 0 | 0 | 0 |
| 151 | 290.27 | 6 | 4 | 0.29 | 0.33 | 1 | 115.06 | -1.68 | VS | 71.83 | 0.55 | 0 | 0 | 0 | 0 | 0 |
| 152 | 254.24 | 4 | 2 | 2.4  | 0.07 | 0 | 74.6   | -4.16 | MS | 68.76 | 0.55 | 0 | 0 | 0 | 0 | 0 |
| 153 | 254.24 | 4 | 1 | 2.39 | 0.07 | 1 | 63.6   | -4.02 | MS | 68.26 | 0.55 | 0 | 0 | 0 | 0 | 0 |
| 154 | 276.28 | 5 | 4 | 0.52 | 0.4  | 0 | 97.99  | -2.01 | S  | 71.41 | 0.55 | 0 | 0 | 0 | 0 | 0 |
| 155 | 290.27 | 6 | 4 | 0.28 | 0.33 | 0 | 115.06 | -1.84 | VS | 71.83 | 0.55 | 0 | 0 | 0 | 0 | 0 |

---

**EUR**

|     |        |    |   |      |      |   |        |       |    |        |      |   |   |   |   |   |
|-----|--------|----|---|------|------|---|--------|-------|----|--------|------|---|---|---|---|---|
| 13  | 270.24 | 5  | 3 | 1.87 | 0.07 | 0 | 94.83  | -3.67 | S  | 70.78  | 0.55 | 0 | 0 | 0 | 0 | 0 |
| 15  | 288.3  | 5  | 3 | 1.94 | 0.31 | 1 | 86.99  | -3.36 | S  | 78.35  | 0.55 | 0 | 0 | 0 | 0 | 0 |
| 18  | 286.24 | 6  | 4 | 1.63 | 0.07 | 0 | 115.06 | -3.87 | S  | 72.81  | 0.55 | 0 | 0 | 0 | 0 | 0 |
| 19  | 300.26 | 6  | 3 | 1.96 | 0.12 | 1 | 104.06 | -4.08 | MS | 77.28  | 0.55 | 0 | 0 | 0 | 0 | 0 |
| 20  | 402.35 | 9  | 4 | 1.11 | 0.25 | 6 | 150.59 | -3.25 | S  | 98.47  | 0.55 | 0 | 0 | 1 | 1 | 1 |
| 60  | 302.28 | 6  | 3 | 2.34 | 0.19 | 1 | 96.22  | -4.04 | MS | 78.38  | 0.55 | 0 | 0 | 0 | 0 | 0 |
| 63  | 300.26 | 6  | 3 | 1.5  | 0.12 | 2 | 104.06 | -3.1  | S  | 76.41  | 0.55 | 0 | 0 | 0 | 0 | 0 |
| 97  | 300.22 | 7  | 4 | 1.07 | 0    | 1 | 132.13 | -3.22 | S  | 72.78  | 0.56 | 0 | 0 | 0 | 1 | 0 |
| 154 | 276.28 | 5  | 4 | 0.52 | 0.4  | 0 | 97.99  | -2.01 | S  | 71.41  | 0.55 | 0 | 0 | 0 | 0 | 0 |
| 156 | 272.25 | 5  | 3 | 2.34 | 0.13 | 0 | 86.99  | -3.98 | S  | 71.89  | 0.55 | 0 | 0 | 0 | 0 | 0 |
| 157 | 286.28 | 5  | 2 | 2.7  | 0.19 | 1 | 75.99  | -4.18 | MS | 76.36  | 0.55 | 0 | 0 | 0 | 0 | 0 |
| 158 | 418.39 | 9  | 4 | 1.49 | 0.38 | 4 | 134.91 | -3.93 | S  | 102.51 | 0.55 | 0 | 0 | 0 | 1 | 0 |
| 159 | 416.38 | 9  | 4 | 1.02 | 0.33 | 4 | 142.75 | -3.63 | S  | 101.41 | 0.55 | 0 | 0 | 1 | 1 | 0 |
| 160 | 588.6  | 10 | 6 | 3.59 | 0.33 | 4 | 173.98 | -6.46 | PS | 159.7  | 0.17 | 2 | 3 | 1 | 1 | 2 |
| 161 | 432.38 | 10 | 5 | 0.25 | 0.33 | 5 | 162.98 | -2.86 | S  | 102.57 | 0.55 | 0 | 1 | 1 | 1 | 1 |
| 162 | 420.41 | 9  | 5 | 0.81 | 0.48 | 4 | 145.91 | -3.13 | S  | 104.5  | 0.55 | 0 | 0 | 1 | 1 | 0 |



|     |        |   |   |      |     |   |       |       |   |       |      |   |   |   |   |   |
|-----|--------|---|---|------|-----|---|-------|-------|---|-------|------|---|---|---|---|---|
| 163 | 276.28 | 5 | 4 | 0.51 | 0.4 | 0 | 97.99 | -2.01 | S | 71.41 | 0.55 | 0 | 0 | 0 | 0 | 0 |
|-----|--------|---|---|------|-----|---|-------|-------|---|-------|------|---|---|---|---|---|

---

**FUS**

|     |        |   |   |       |      |   |        |       |    |       |      |   |   |   |   |   |
|-----|--------|---|---|-------|------|---|--------|-------|----|-------|------|---|---|---|---|---|
| 5   | 284.26 | 5 | 2 | 2.57  | 0.12 | 1 | 83.83  | -4.81 | MS | 75.25 | 0.55 | 0 | 0 | 0 | 0 | 0 |
| 6   | 304.29 | 6 | 3 | 0.91  | 0.38 | 1 | 104.06 | -2.54 | S  | 76.76 | 0.56 | 0 | 0 | 0 | 0 | 0 |
| 7   | 324.33 | 7 | 5 | 0.4   | 0.56 | 1 | 127.45 | -2.03 | S  | 80.28 | 0.55 | 0 | 0 | 0 | 0 | 0 |
| 8   | 340.33 | 8 | 6 | -0.53 | 0.56 | 1 | 147.68 | -1.51 | VS | 81.44 | 0.55 | 1 | 1 | 1 | 1 | 1 |
| 10  | 336.29 | 8 | 5 | -0.05 | 0.38 | 1 | 144.52 | -2.14 | S  | 79.94 | 0.56 | 0 | 1 | 1 | 1 | 0 |
| 164 | 304.29 | 6 | 3 | 0.97  | 0.38 | 1 | 104.06 | -2.54 | S  | 76.76 | 0.56 | 0 | 0 | 0 | 0 | 0 |
| 165 | 324.33 | 7 | 5 | 0.37  | 0.56 | 1 | 127.45 | -2.03 | S  | 80.28 | 0.55 | 0 | 0 | 0 | 0 | 0 |
| 166 | 306.31 | 6 | 3 | 1.24  | 0.56 | 1 | 96.22  | -2.56 | S  | 76.93 | 0.55 | 0 | 0 | 0 | 0 | 0 |
| 167 | 340.33 | 8 | 6 | -0.43 | 0.56 | 1 | 147.68 | -1.51 | VS | 81.44 | 0.55 | 1 | 1 | 1 | 1 | 1 |
| 168 | 324.33 | 7 | 5 | 0.36  | 0.56 | 1 | 127.45 | -2.03 | S  | 80.28 | 0.55 | 0 | 0 | 0 | 0 | 0 |
| 169 | 352.38 | 5 | 0 | 3.21  | 0.29 | 5 | 69.67  | -3.98 | S  | 97.29 | 0.55 | 0 | 0 | 0 | 0 | 0 |
| 170 | 328.27 | 7 | 3 | 1.68  | 0.12 | 2 | 121.13 | -4.07 | MS | 82.5  | 0.55 | 0 | 0 | 0 | 0 | 0 |

---

**ENG**

|     |        |    |   |      |      |   |        |       |    |        |      |   |   |   |   |   |
|-----|--------|----|---|------|------|---|--------|-------|----|--------|------|---|---|---|---|---|
| 171 | 616.57 | 12 | 5 | 2.53 | 0.33 | 4 | 197.12 | -5.66 | MS | 153.75 | 0.11 | 2 | 3 | 1 | 1 | 3 |
| 172 | 616.57 | 12 | 5 | 2.57 | 0.33 | 4 | 197.12 | -5.66 | MS | 153.75 | 0.11 | 2 | 3 | 1 | 1 | 3 |
| 173 | 616.57 | 12 | 5 | 2.61 | 0.33 | 4 | 197.12 | -5.66 | MS | 153.75 | 0.11 | 2 | 3 | 1 | 1 | 3 |
| 174 | 616.57 | 12 | 3 | 2.85 | 0.36 | 5 | 182.96 | -5.44 | MS | 152.77 | 0.11 | 2 | 3 | 1 | 1 | 3 |
| 175 | 634.58 | 13 | 5 | 2.15 | 0.36 | 8 | 214.19 | -4.86 | MS | 156.54 | 0.11 | 2 | 3 | 1 | 1 | 3 |
| 176 | 634.58 | 13 | 5 | 2.34 | 0.36 | 8 | 214.19 | -4.86 | MS | 156.54 | 0.11 | 2 | 3 | 1 | 1 | 3 |
| 177 | 616.57 | 12 | 3 | 2.88 | 0.36 | 5 | 182.96 | -5.44 | MS | 152.77 | 0.11 | 2 | 3 | 1 | 1 | 3 |

---

**SPO**

|     |        |   |   |       |      |   |        |       |    |       |      |   |   |   |   |   |
|-----|--------|---|---|-------|------|---|--------|-------|----|-------|------|---|---|---|---|---|
| 101 | 304.29 | 6 | 3 | 1.11  | 0.38 | 1 | 104.06 | -2.42 | S  | 77.04 | 0.55 | 0 | 0 | 0 | 0 | 0 |
| 178 | 320.29 | 7 | 4 | 0.26  | 0.38 | 1 | 124.29 | -1.81 | VS | 78.2  | 0.55 | 0 | 0 | 0 | 0 | 0 |
| 179 | 338.31 | 8 | 5 | -0.39 | 0.5  | 1 | 144.52 | -1.46 | VS | 79.88 | 0.55 | 0 | 1 | 1 | 1 | 0 |
| 180 | 356.32 | 9 | 7 | -1.43 | 0.56 | 1 | 167.91 | -0.68 | VS | 81.82 | 0.55 | 1 | 1 | 1 | 1 | 3 |
| 181 | 340.33 | 8 | 6 | -0.79 | 0.56 | 1 | 147.68 | -1.07 | VS | 80.62 | 0.55 | 1 | 1 | 1 | 1 | 1 |
| 182 | 372.75 | 8 | 5 | -0.12 | 0.5  | 1 | 144.52 | -1.99 | VS | 84.71 | 0.55 | 0 | 1 | 1 | 1 | 0 |
| 183 | 338.31 | 8 | 5 | -0.49 | 0.56 | 1 | 139.98 | -1.21 | VS | 78.46 | 0.55 | 0 | 1 | 0 | 1 | 0 |

---

---

**OTH**

|     |        |    |   |      |      |   |        |       |    |        |      |   |   |   |   |   |
|-----|--------|----|---|------|------|---|--------|-------|----|--------|------|---|---|---|---|---|
| 184 | 282.29 | 4  | 0 | 2.8  | 0.18 | 2 | 52.6   | -3.88 | S  | 77.7   | 0.55 | 0 | 0 | 0 | 0 | 0 |
| 185 | 254.24 | 4  | 2 | 2.41 | 0.07 | 0 | 74.6   | -4.16 | MS | 68.76  | 0.55 | 0 | 0 | 0 | 0 | 0 |
| 186 | 240.21 | 4  | 2 | 2.04 | 0    | 0 | 74.6   | -3.81 | S  | 63.8   | 0.55 | 0 | 0 | 0 | 0 | 0 |
| 187 | 284.26 | 5  | 2 | 2.2  | 0.12 | 1 | 83.83  | -3.87 | S  | 75.25  | 0.55 | 0 | 0 | 0 | 0 | 0 |
| 188 | 298.29 | 5  | 1 | 2.56 | 0.18 | 2 | 72.83  | -4.08 | MS | 79.72  | 0.55 | 0 | 0 | 0 | 0 | 0 |
| 189 | 268.26 | 4  | 1 | 2.6  | 0.12 | 1 | 63.6   | -4.02 | MS | 73.23  | 0.55 | 0 | 0 | 0 | 0 | 0 |
| 190 | 314.29 | 6  | 2 | 2.15 | 0.18 | 2 | 93.06  | -3.95 | S  | 81.75  | 0.55 | 0 | 0 | 0 | 0 | 0 |
| 191 | 256.21 | 5  | 3 | 1.62 | 0    | 0 | 94.83  | -3.67 | S  | 65.82  | 0.55 | 0 | 0 | 0 | 0 | 0 |
| 192 | 300.26 | 6  | 3 | 1.96 | 0.12 | 1 | 104.06 | -4.08 | MS | 77.28  | 0.55 | 0 | 0 | 0 | 0 | 0 |
| 193 | 336.29 | 8  | 5 | 0.05 | 0.38 | 1 | 144.52 | -2.02 | S  | 80.23  | 0.55 | 0 | 0 | 1 | 1 | 0 |
| 194 | 332.35 | 6  | 3 | 1.73 | 0.44 | 2 | 104.06 | -3.01 | S  | 86.81  | 0.55 | 0 | 0 | 0 | 0 | 0 |
| 195 | 268.26 | 4  | 1 | 2.63 | 0.12 | 1 | 63.6   | -4.02 | MS | 73.23  | 0.55 | 0 | 0 | 0 | 0 | 0 |
| 196 | 316.26 | 7  | 5 | 1.08 | 0.12 | 1 | 135.29 | -3.42 | S  | 78.78  | 0.55 | 0 | 0 | 0 | 1 | 0 |
| 197 | 330.29 | 7  | 4 | 1.42 | 0.18 | 2 | 124.29 | -3.42 | S  | 83.51  | 0.55 | 0 | 0 | 0 | 0 | 0 |
| 198 | 346.29 | 8  | 5 | 1.13 | 0.18 | 2 | 144.52 | -3.27 | S  | 85.53  | 0.55 | 0 | 0 | 1 | 1 | 0 |
| 199 | 286.24 | 6  | 3 | 1.53 | 0.07 | 1 | 104.06 | -3.43 | S  | 72.31  | 0.55 | 0 | 0 | 0 | 0 | 0 |
| 200 | 574.49 | 12 | 6 | 0.69 | 0.33 | 2 | 208.12 | -3.73 | S  | 138.35 | 0.11 | 3 | 2 | 1 | 1 | 4 |
| 201 | 272.21 | 6  | 4 | 1.11 | 0    | 0 | 115.06 | -3.23 | S  | 67.84  | 0.55 | 0 | 0 | 0 | 0 | 0 |
| 202 | 538.46 | 10 | 6 | 3.64 | 0.07 | 1 | 189.66 | -7.49 | PS | 140.56 | 0.17 | 2 | 2 | 1 | 1 | 3 |

|     |        |   |   |      |      |   |        |       |    |        |      |   |   |   |   |   |
|-----|--------|---|---|------|------|---|--------|-------|----|--------|------|---|---|---|---|---|
| 203 | 298.29 | 5 | 1 | 2.63 | 0.18 | 2 | 72.83  | -4.08 | MS | 79.72  | 0.55 | 0 | 0 | 0 | 0 | 0 |
| 204 | 352.38 | 5 | 1 | 3.78 | 0.24 | 4 | 72.83  | -5.17 | MS | 98.48  | 0.55 | 0 | 0 | 0 | 0 | 0 |
| 205 | 284.26 | 5 | 2 | 2.25 | 0.12 | 1 | 83.83  | -3.87 | S  | 75.25  | 0.55 | 0 | 0 | 0 | 0 | 0 |
| 206 | 300.26 | 6 | 4 | 1.4  | 0.12 | 1 | 115.06 | -3.56 | S  | 76.75  | 0.55 | 0 | 0 | 0 | 0 | 0 |
| 207 | 328.27 | 7 | 3 | 1.48 | 0.12 | 3 | 121.13 | -3.33 | S  | 81.68  | 0.55 | 0 | 0 | 0 | 0 | 0 |
| 208 | 398.41 | 7 | 2 | 2.95 | 0.36 | 3 | 102.29 | -4.69 | MS | 104.75 | 0.55 | 0 | 0 | 0 | 0 | 0 |

S: Soluble

PS: Poorly Soluble

MS: Moderately soluble

VS: Very Soluble

**Table S2.** Pharmacokinetics behavior of anthraquinones. Compounds number according to the main text.

| Molecule   | GI absorption | BBB permeant | Pgp substrate | CYP1A2 inhibition |         |        |        |        |     |
|------------|---------------|--------------|---------------|-------------------|---------|--------|--------|--------|-----|
|            |               |              |               | CYP1A2            | CYP2C19 | CYP2C9 | CYP2D6 | CYP3A4 |     |
| <b>NIG</b> |               |              |               |                   |         |        |        |        |     |
| 1          | Low           | No           | Yes           | No                | No      | No     | No     | No     | No  |
| 2          | High          | No           | Yes           | No                | No      | No     | No     | No     | No  |
| 3          | High          | No           | No            | No                | No      | No     | No     | No     | No  |
| 4          | High          | No           | No            | Yes               | No      | Yes    | No     | Yes    | Yes |
| 5          | High          | No           | No            | Yes               | No      | Yes    | No     | Yes    | Yes |
| 6          | High          | No           | No            | No                | No      | No     | No     | No     | No  |
| 7          | High          | No           | Yes           | No                | No      | No     | No     | No     | No  |
| 8          | Low           | No           | No            | No                | No      | No     | No     | No     | No  |
| 9          | High          | No           | Yes           | No                | No      | No     | No     | No     | No  |
| 10         | Low           | No           | No            | No                | No      | No     | No     | No     | No  |
| <b>ASP</b> |               |              |               |                   |         |        |        |        |     |
| 7          | High          | No           | Yes           | No                | No      | No     | No     | No     | No  |
| 8          | Low           | No           | No            | No                | No      | No     | No     | No     | No  |
| 10         | Low           | No           | No            | No                | No      | No     | No     | No     | No  |
| 11         | Low           | No           | No            | No                | No      | Yes    | No     | No     | No  |
| 12         | Low           | No           | No            | No                | No      | Yes    | No     | No     | No  |
| 13         | High          | No           | No            | Yes               | No      | No     | No     | No     | Yes |
| 14         | High          | No           | No            | Yes               | No      | Yes    | No     | Yes    | Yes |
| 15         | High          | No           | Yes           | Yes               | No      | No     | No     | No     | No  |
| 16         | High          | No           | Yes           | No                | No      | No     | No     | No     | No  |
| 17         | High          | No           | Yes           | No                | No      | No     | No     | No     | No  |
| 18         | High          | No           | No            | No                | No      | No     | No     | No     | Yes |
| 19         | High          | No           | No            | Yes               | No      | Yes    | No     | Yes    | Yes |
| 20         | Low           | No           | Yes           | No                | No      | No     | No     | No     | No  |
| 21         | Low           | No           | No            | No                | No      | Yes    | No     | No     | No  |

|    |      |     |     |     |     |     |     |     |
|----|------|-----|-----|-----|-----|-----|-----|-----|
| 22 | Low  | No  | No  | No  | No  | Yes | No  | No  |
| 23 | Low  | No  | No  | No  | No  | Yes | No  | No  |
| 24 | Low  | No  | Yes | No  | No  | No  | No  | No  |
| 25 | Low  | No  | No  | No  | No  | No  | No  | No  |
| 26 | High | No  | No  | No  | No  | Yes | Yes | Yes |
| 27 | High | No  | No  | No  | No  | Yes | Yes | Yes |
| 28 | High | No  | No  | Yes | No  | Yes | Yes | Yes |
| 29 | High | No  | No  | No  | No  | Yes | No  | Yes |
| 30 | High | No  | Yes | No  | No  | Yes | Yes | Yes |
| 31 | High | No  | Yes | No  | No  | Yes | Yes | Yes |
| 32 | High | No  | No  | No  | Yes | Yes | Yes | Yes |
| 33 | High | No  | No  | Yes | No  | Yes | No  | Yes |
| 34 | High | No  | No  | No  | No  | No  | No  | No  |
| 36 | High | No  | Yes | No  | No  | Yes | No  | Yes |
| 37 | High | No  | Yes | No  | No  | No  | No  | No  |
| 38 | High | No  | No  | No  | No  | Yes | Yes | Yes |
| 39 | Low  | No  | Yes | No  | No  | No  | No  | No  |
| 40 | High | No  | Yes | No  | No  | No  | No  | No  |
| 41 | High | No  | No  | Yes | No  | No  | No  | Yes |
| 42 | High | No  | No  | No  | No  | No  | No  | Yes |
| 43 | High | No  | No  | No  | Yes | Yes | Yes | Yes |
| 44 | High | No  | No  | Yes | No  | Yes | Yes | Yes |
| 45 | High | No  | No  | Yes | No  | Yes | No  | Yes |
| 46 | High | No  | No  | Yes | No  | Yes | No  | Yes |
| 47 | High | Yes | No  | Yes | Yes | No  | No  | Yes |
| 48 | High | Yes | No  | Yes | Yes | Yes | No  | Yes |
| 49 | High | Yes | No  | Yes | Yes | No  | No  | No  |
| 50 | High | No  | No  | Yes | No  | No  | No  | Yes |
| 51 | High | Yes | No  | Yes | No  | No  | No  | Yes |
| 52 | High | Yes | No  | Yes | No  | No  | No  | Yes |
| 53 | High | No  | Yes | No  | No  | No  | No  | Yes |

|    |      |     |     |     |     |     |     |     |
|----|------|-----|-----|-----|-----|-----|-----|-----|
| 54 | High | No  | No  | Yes | No  | No  | No  | Yes |
| 55 | High | No  | No  | Yes | No  | No  | No  | Yes |
| 56 | High | No  | No  | Yes | No  | No  | No  | Yes |
| 57 | High | Yes | No  | Yes | Yes | Yes | No  | Yes |
| 58 | High | No  | No  | Yes | No  | Yes | No  | Yes |
| 59 | High | No  | No  | Yes | No  | No  | No  | Yes |
| 60 | High | No  | No  | Yes | No  | No  | No  | Yes |
| 61 | Low  | No  | Yes | No  | No  | No  | No  | No  |
| 62 | High | No  | No  | No  | No  | No  | No  | Yes |
| 63 | High | No  | No  | Yes | No  | No  | No  | Yes |
| 64 | High | No  | No  | Yes | No  | Yes | No  | Yes |
| 65 | High | No  | No  | Yes | No  | Yes | No  | Yes |
| 66 | High | No  | No  | Yes | No  | No  | No  | Yes |
| 67 | High | No  | No  | Yes | No  | Yes | No  | Yes |
| 68 | High | No  | No  | No  | No  | Yes | Yes | Yes |
| 69 | High | No  | No  | No  | No  | Yes | No  | Yes |
| 70 | Low  | No  | No  | No  | Yes | Yes | No  | Yes |
| 71 | Low  | No  | No  | Yes | No  | Yes | Yes | Yes |
| 72 | High | No  | No  | Yes | Yes | Yes | No  | Yes |
| 73 | High | No  | No  | Yes | Yes | Yes | No  | Yes |
| 74 | High | No  | No  | Yes | Yes | Yes | No  | Yes |
| 75 | Low  | No  | No  | No  | Yes | Yes | No  | Yes |
| 76 | High | No  | No  | Yes | No  | Yes | No  | Yes |
| 77 | High | No  | No  | Yes | No  | Yes | No  | Yes |
| 78 | High | No  | No  | Yes | Yes | Yes | No  | Yes |
| 79 | High | No  | No  | Yes | Yes | Yes | No  | Yes |
| 80 | High | No  | No  | No  | Yes | Yes | No  | Yes |

---

|            |      |    |    |     |    |    |    |     |
|------------|------|----|----|-----|----|----|----|-----|
| <b>PEN</b> |      |    |    |     |    |    |    |     |
| 13         | High | No | No | Yes | No | No | No | Yes |

|    |      |     |     |     |    |     |     |     |
|----|------|-----|-----|-----|----|-----|-----|-----|
| 17 | High | No  | Yes | No  | No | No  | No  | No  |
| 26 | High | No  | No  | No  | No | Yes | Yes | Yes |
| 27 | High | No  | No  | No  | No | Yes | Yes | Yes |
| 37 | High | No  | Yes | No  | No | No  | No  | No  |
| 81 | Low  | No  | No  | No  | No | Yes | No  | No  |
| 82 | Low  | No  | No  | No  | No | Yes | No  | No  |
| 83 | High | Yes | No  | Yes | No | No  | No  | Yes |
| 84 | High | No  | No  | No  | No | No  | No  | Yes |
| 85 | High | No  | No  | Yes | No | Yes | No  | Yes |
| 86 | Low  | No  | No  | No  | No | No  | No  | No  |
| 87 | Low  | No  | No  | No  | No | No  | No  | No  |
| 88 | High | No  | No  | Yes | No | No  | No  | Yes |
| 89 | Low  | No  | Yes | No  | No | Yes | No  | No  |
| 90 | Low  | No  | Yes | No  | No | No  | No  | No  |
| 91 | Low  | No  | Yes | No  | No | Yes | No  | Yes |
| 92 | Low  | No  | Yes | No  | No | Yes | No  | Yes |
| 93 | Low  | No  | Yes | No  | No | No  | No  | No  |
| 94 | Low  | No  | Yes | No  | No | Yes | No  | Yes |
| 95 | Low  | No  | Yes | No  | No | Yes | No  | Yes |
| 96 | Low  | No  | Yes | No  | No | No  | No  | No  |
| 97 | High | No  | No  | No  | No | No  | No  | No  |
| 98 | High | No  | No  | No  | No | No  | No  | Yes |

---

**STE**

---

|     |      |    |     |    |    |    |    |    |
|-----|------|----|-----|----|----|----|----|----|
| 99  | Low  | No | No  | No | No | No | No | No |
| 100 | High | No | No  | No | No | No | No | No |
| 101 | High | No | Yes | No | No | No | No | No |
| 102 | High | No | Yes | No | No | No | No | No |
| 103 | High | No | No  | No | No | No | No | No |

|            |      |    |     |     |     |     |    |     |
|------------|------|----|-----|-----|-----|-----|----|-----|
| <b>104</b> | High | No | No  | No  | No  | No  | No | No  |
| <b>105</b> | High | No | No  | No  | No  | No  | No | No  |
| <b>106</b> | High | No | Yes | No  | No  | No  | No | No  |
| <b>107</b> | Low  | No | No  | No  | No  | No  | No | No  |
| <b>108</b> | High | No | No  | Yes | No  | Yes | No | Yes |
| <b>109</b> | High | No | No  | No  | No  | No  | No | No  |
| <b>110</b> | Low  | No | Yes | No  | No  | No  | No | No  |
| <b>111</b> | Low  | No | No  | No  | No  | No  | No | No  |
| <b>112</b> | Low  | No | No  | No  | No  | Yes | No | No  |
| <b>113</b> | Low  | No | No  | No  | No  | Yes | No | No  |
| <b>114</b> | Low  | No | No  | No  | Yes | Yes | No | No  |
| <b>115</b> | Low  | No | Yes | No  | No  | No  | No | No  |
| <b>116</b> | Low  | No | Yes | No  | No  | No  | No | No  |
| <b>117</b> | Low  | No | No  | No  | No  | Yes | No | No  |
| <b>118</b> | Low  | No | No  | No  | Yes | Yes | No | No  |
| <b>119</b> | Low  | No | No  | No  | Yes | Yes | No | No  |
| <b>120</b> | Low  | No | No  | No  | Yes | No  | No | No  |
| <b>121</b> | Low  | No | No  | No  | Yes | Yes | No | No  |
| <b>122</b> | Low  | No | No  | No  | Yes | Yes | No | No  |
| <b>123</b> | Low  | No | No  | No  | No  | Yes | No | No  |
| <b>124</b> | Low  | No | No  | No  | No  | Yes | No | No  |
| <b>125</b> | Low  | No | No  | No  | No  | Yes | No | No  |
| <b>126</b> | Low  | No | No  | No  | No  | Yes | No | No  |
| <b>127</b> | Low  | No | No  | No  | No  | Yes | No | No  |
| <b>128</b> | Low  | No | No  | No  | No  | Yes | No | No  |
| <b>129</b> | Low  | No | Yes | No  | No  | No  | No | No  |
| <b>130</b> | Low  | No | No  | No  | Yes | Yes | No | No  |

---

**ALT**



---

|            |      |    |     |     |     |     |    |     |
|------------|------|----|-----|-----|-----|-----|----|-----|
| <b>100</b> | High | No | No  | No  | No  | No  | No | No  |
| <b>101</b> | High | No | Yes | No  | No  | No  | No | No  |
| <b>102</b> | High | No | Yes | No  | No  | No  | No | No  |
| <b>104</b> | High | No | No  | No  | No  | No  | No | No  |
| <b>105</b> | High | No | No  | No  | No  | No  | No | No  |
| <b>107</b> | Low  | No | No  | No  | No  | No  | No | No  |
| <b>108</b> | High | No | No  | Yes | No  | Yes | No | Yes |
| <b>114</b> | Low  | No | No  | No  | Yes | Yes | No | No  |
| <b>131</b> | Low  | No | No  | No  | No  | Yes | No | No  |
| <b>132</b> | Low  | No | No  | No  | No  | Yes | No | No  |
| <b>133</b> | Low  | No | No  | No  | No  | Yes | No | No  |
| <b>134</b> | Low  | No | Yes | No  | No  | No  | No | No  |
| <b>135</b> | Low  | No | No  | No  | No  | Yes | No | No  |
| <b>136</b> | High | No | Yes | No  | No  | No  | No | No  |
| <b>137</b> | High | No | Yes | No  | No  | No  | No | No  |
| <b>138</b> | High | No | Yes | No  | No  | No  | No | No  |
| <b>139</b> | High | No | Yes | No  | No  | No  | No | No  |
| <b>140</b> | Low  | No | Yes | No  | Yes | No  | No | No  |
| <b>141</b> | High | No | No  | Yes | No  | Yes | No | Yes |
| <b>142</b> | High | No | No  | Yes | No  | No  | No | No  |

---

|            |      |     |    |     |    |    |    |     |
|------------|------|-----|----|-----|----|----|----|-----|
| <b>TRI</b> |      |     |    |     |    |    |    |     |
| <b>13</b>  | High | No  | No | Yes | No | No | No | Yes |
| <b>83</b>  | High | Yes | No | Yes | No | No | No | Yes |
| <b>84</b>  | High | No  | No | No  | No | No | No | Yes |
| <b>143</b> | High | No  | No | No  | No | No | No | No  |
| <b>144</b> | High | No  | No | No  | No | No | No | No  |
| <b>145</b> | High | Yes | No | Yes | No | No | No | Yes |

|            |      |     |    |     |     |     |    |     |
|------------|------|-----|----|-----|-----|-----|----|-----|
| <b>146</b> | High | No  | No | Yes | No  | No  | No | Yes |
| <b>147</b> | High | Yes | No | Yes | Yes | No  | No | Yes |
| <b>148</b> | High | No  | No | No  | No  | No  | No | No  |
| <b>149</b> | High | No  | No | Yes | No  | No  | No | Yes |
| <b>150</b> | High | No  | No | No  | No  | No  | No | No  |
| <b>151</b> | High | No  | No | No  | No  | No  | No | No  |
| <b>152</b> | High | Yes | No | Yes | No  | No  | No | Yes |
| <b>153</b> | High | Yes | No | Yes | No  | Yes | No | Yes |
| <b>154</b> | High | No  | No | No  | No  | No  | No | No  |
| <b>155</b> | High | No  | No | No  | No  | No  | No | No  |

---

**EUR**

|            |      |     |     |     |    |     |     |     |
|------------|------|-----|-----|-----|----|-----|-----|-----|
| <b>13</b>  | High | No  | No  | Yes | No | No  | No  | Yes |
| <b>15</b>  | High | No  | Yes | Yes | No | No  | No  | No  |
| <b>18</b>  | High | No  | No  | No  | No | No  | No  | Yes |
| <b>19</b>  | High | No  | No  | Yes | No | Yes | No  | Yes |
| <b>20</b>  | Low  | No  | Yes | No  | No | No  | No  | No  |
| <b>60</b>  | High | No  | No  | Yes | No | No  | No  | Yes |
| <b>63</b>  | High | No  | No  | Yes | No | No  | No  | Yes |
| <b>97</b>  | High | No  | No  | No  | No | No  | No  | No  |
| <b>154</b> | High | No  | No  | No  | No | No  | No  | No  |
| <b>156</b> | High | No  | No  | Yes | No | No  | No  | Yes |
| <b>157</b> | High | Yes | No  | Yes | No | Yes | Yes | Yes |
| <b>158</b> | High | No  | Yes | No  | No | No  | No  | No  |
| <b>159</b> | Low  | No  | Yes | No  | No | No  | No  | No  |
| <b>160</b> | Low  | No  | No  | No  | No | Yes | No  | No  |
| <b>161</b> | Low  | No  | Yes | No  | No | No  | No  | No  |
| <b>162</b> | Low  | No  | Yes | No  | No | No  | No  | No  |

|     |      |    |    |    |    |    |    |    |    |
|-----|------|----|----|----|----|----|----|----|----|
| 163 | High | No | No | No | No | No | No | No | No |
|-----|------|----|----|----|----|----|----|----|----|

---

**FUS**

---

|     |      |     |     |     |     |     |    |     |
|-----|------|-----|-----|-----|-----|-----|----|-----|
| 5   | High | No  | No  | Yes | No  | Yes | No | Yes |
| 6   | High | No  | No  | No  | No  | No  | No | No  |
| 7   | High | No  | Yes | No  | No  | No  | No | No  |
| 8   | Low  | No  | No  | No  | No  | No  | No | No  |
| 10  | Low  | No  | No  | No  | No  | No  | No | No  |
| 164 | High | No  | No  | No  | No  | No  | No | No  |
| 165 | High | No  | Yes | No  | No  | No  | No | No  |
| 166 | High | No  | Yes | No  | No  | No  | No | No  |
| 167 | Low  | No  | No  | No  | No  | No  | No | No  |
| 168 | High | No  | Yes | No  | No  | No  | No | No  |
| 169 | High | Yes | No  | Yes | Yes | Yes | No | Yes |
| 170 | High | No  | No  | No  | No  | Yes | No | Yes |

---

**ENG**

---

|     |     |    |     |    |    |     |    |    |
|-----|-----|----|-----|----|----|-----|----|----|
| 171 | Low | No | Yes | No | No | Yes | No | No |
| 172 | Low | No | Yes | No | No | Yes | No | No |
| 173 | Low | No | Yes | No | No | Yes | No | No |
| 174 | Low | No | Yes | No | No | No  | No | No |
| 175 | Low | No | No  | No | No | No  | No | No |
| 176 | Low | No | No  | No | No | No  | No | No |
| 177 | Low | No | Yes | No | No | No  | No | No |

---

---

**SPO**

---

|            |      |    |     |    |    |    |    |    |
|------------|------|----|-----|----|----|----|----|----|
| <b>101</b> | High | No | Yes | No | No | No | No | No |
| <b>178</b> | High | No | No  | No | No | No | No | No |
| <b>179</b> | Low  | No | No  | No | No | No | No | No |
| <b>180</b> | Low  | No | No  | No | No | No | No | No |
| <b>181</b> | Low  | No | No  | No | No | No | No | No |
| <b>182</b> | Low  | No | No  | No | No | No | No | No |
| <b>183</b> | Low  | No | No  | No | No | No | No | No |

---

**OTH**

---

|            |      |     |     |     |     |     |    |     |
|------------|------|-----|-----|-----|-----|-----|----|-----|
| <b>184</b> | High | Yes | No  | Yes | Yes | Yes | No | Yes |
| <b>185</b> | High | Yes | No  | Yes | No  | No  | No | Yes |
| <b>186</b> | High | Yes | No  | Yes | No  | No  | No | Yes |
| <b>187</b> | High | No  | No  | Yes | No  | No  | No | Yes |
| <b>188</b> | High | Yes | No  | Yes | Yes | Yes | No | Yes |
| <b>189</b> | High | Yes | No  | Yes | Yes | Yes | No | Yes |
| <b>190</b> | High | No  | No  | Yes | No  | Yes | No | Yes |
| <b>191</b> | High | No  | No  | No  | No  | No  | No | Yes |
| <b>192</b> | High | No  | No  | Yes | No  | Yes | No | Yes |
| <b>193</b> | Low  | No  | No  | No  | No  | No  | No | No  |
| <b>194</b> | High | No  | Yes | No  | No  | No  | No | No  |
| <b>195</b> | High | Yes | No  | Yes | Yes | Yes | No | Yes |
| <b>196</b> | High | No  | No  | No  | No  | No  | No | No  |
| <b>197</b> | High | No  | Yes | No  | No  | No  | No | Yes |
| <b>198</b> | Low  | No  | Yes | No  | No  | No  | No | Yes |
| <b>199</b> | High | No  | No  | No  | No  | No  | No | Yes |
| <b>200</b> | Low  | No  | Yes | No  | Yes | No  | No | No  |
| <b>201</b> | High | No  | No  | No  | No  | No  | No | Yes |
| <b>202</b> | Low  | No  | No  | No  | Yes | Yes | No | No  |

|            |      |     |     |     |     |     |    |     |
|------------|------|-----|-----|-----|-----|-----|----|-----|
| <b>203</b> | High | Yes | No  | Yes | Yes | Yes | No | Yes |
| <b>204</b> | High | Yes | No  | Yes | Yes | Yes | No | Yes |
| <b>205</b> | High | No  | No  | Yes | No  | Yes | No | Yes |
| <b>206</b> | High | No  | No  | No  | No  | No  | No | No  |
| <b>207</b> | High | No  | No  | No  | No  | No  | No | No  |
| <b>208</b> | High | No  | Yes | No  | No  | Yes | No | Yes |

---

**Figure S1:** List of 20 anthraquinones-containing compounds with promising drug likeness properties

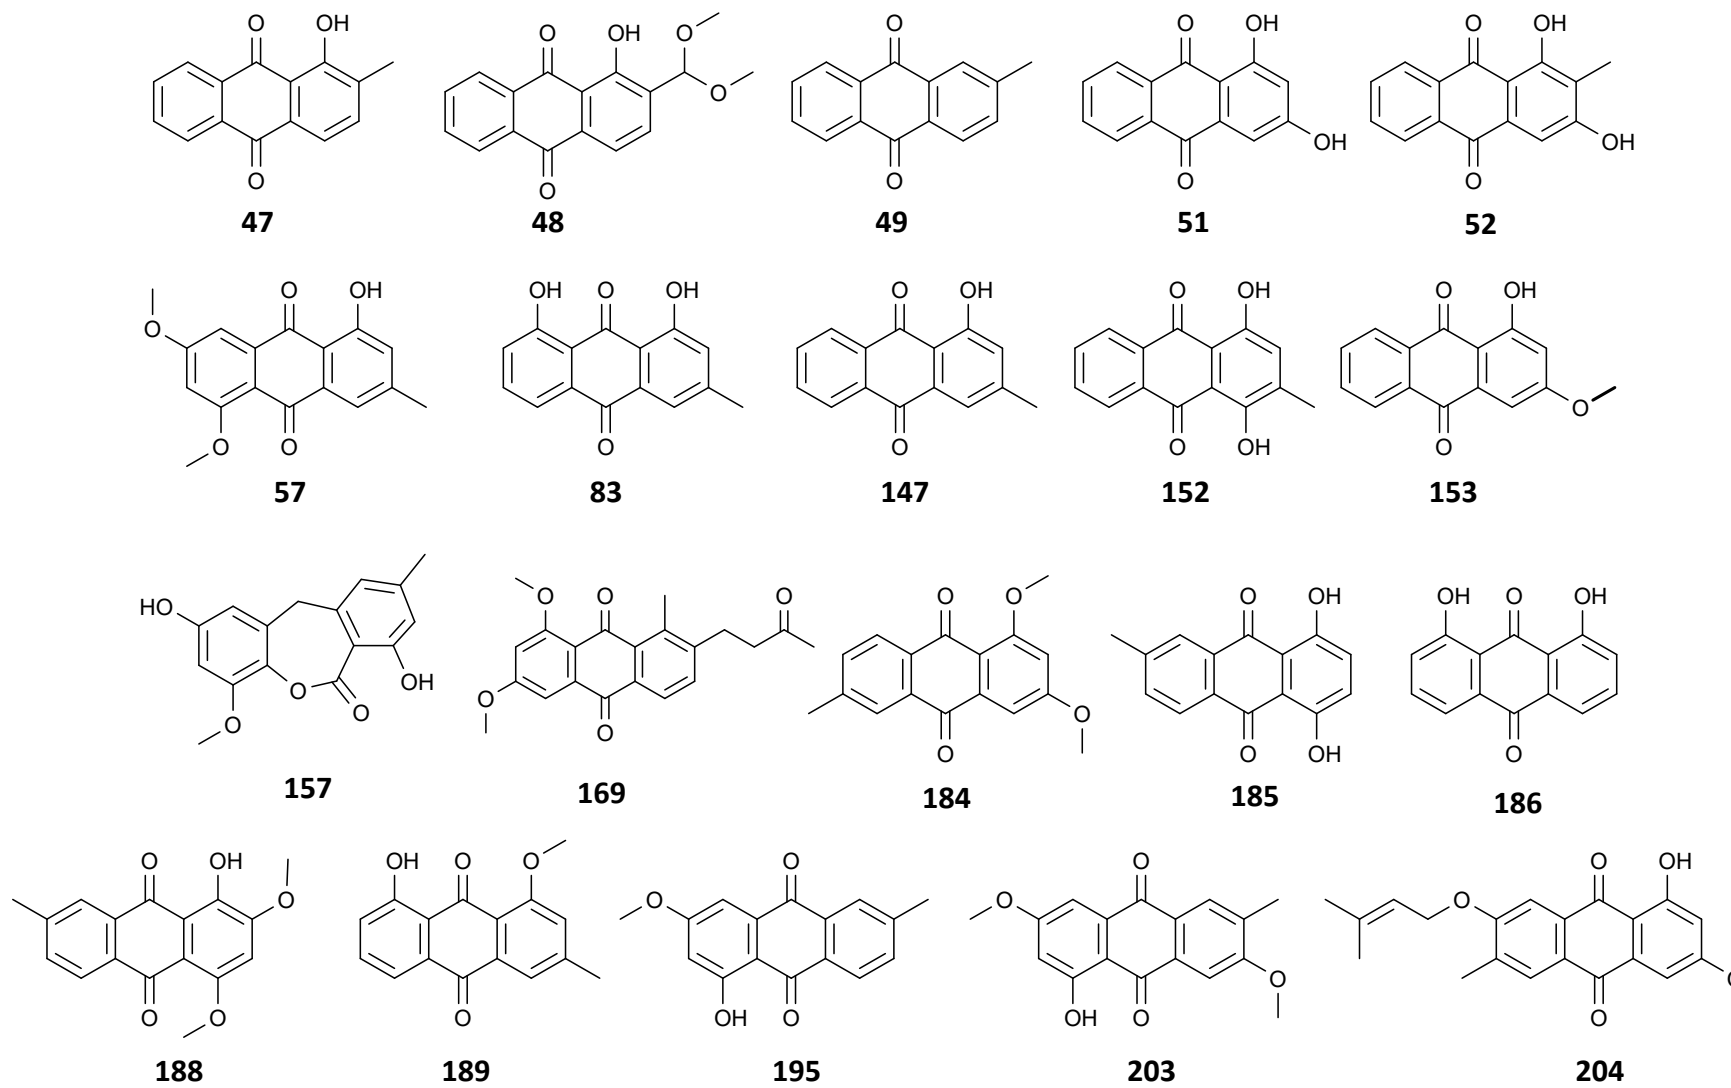

Supplement: d2ra03610j1.pdf [file d2ra03610j1.pdf]
